# Supplementary material for: Drumhead surface states promoted hydrogen evolution reactions in type-II nodal-line topological catalyst Mg3Bi2
Source: Royal Society of Chemistry journal article supplement (doi:10.1039/d3cp02721j), 2023-01-01
Supplement: d3cp02721j1.pdf [file d3cp02721j1.pdf]

## **Drumhead Surface State Promoted Hydrogen Evolution Reaction in Type-II Nodal-Line Topological Catalyst $\text{Mg}_3\text{Bi}_2$**

Min Zhao <sup>1</sup>, Weizhen Meng <sup>2\*</sup>, Lirong Wang <sup>1</sup>, Zeqing He <sup>1</sup>, Lei Jin <sup>1</sup>, Ying Liu <sup>1</sup>,  
Xuefang Dai <sup>1</sup>, Xiaoming Zhang <sup>1\*</sup>, Hongshi Li <sup>1\*</sup>, and Guodong Liu <sup>1\*</sup>

1. State Key Laboratory of Reliability and Intelligence of Electrical Equipment, and School of Materials Science and Engineering, Hebei University of Technology, Tianjin, 300130, China.

2. College of Physics, Hebei Key Laboratory of Photo physics Research and Application, Hebei Normal University, Shijiazhuang, 050024, China.

E-mail of corresponding authors: [meng199608@126.com](mailto:meng199608@126.com); [zhangxiaoming87@hebut.edu.cn](mailto:zhangxiaoming87@hebut.edu.cn);  
[ish82@126.com](mailto:ish82@126.com); [gdlou1978@126.com](mailto:gdlou1978@126.com)

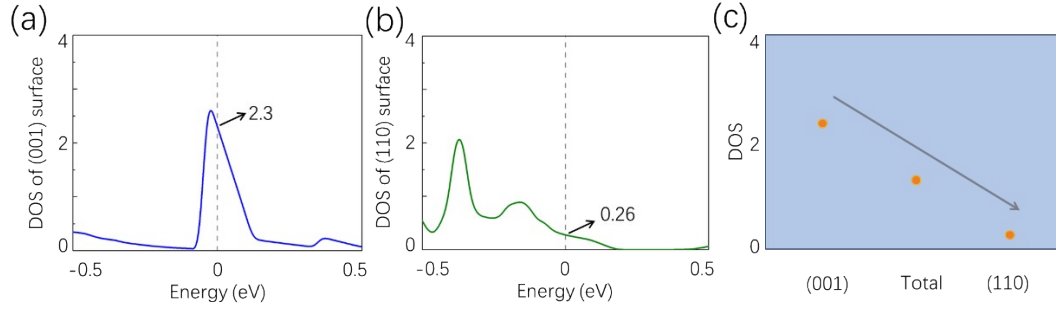

Figure S 1 (a) - (c) Electronic density of states of (001), (110) and bulk bands near Fermi level in  $\text{Mg}_3\text{Bi}_2$  with Kagome lattice, respectively.

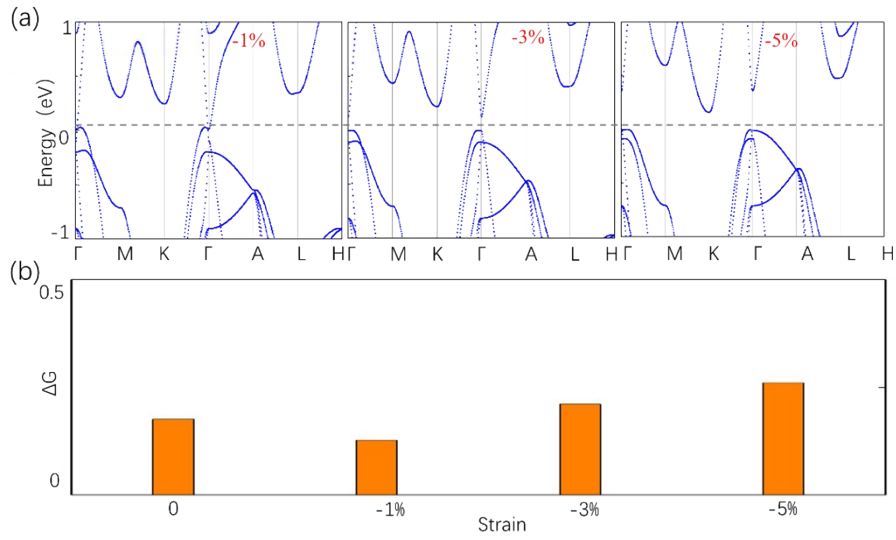

Figure S2. (a) and (b) The electronic band structures and  $\Delta G_H$  under different strains, respectively.

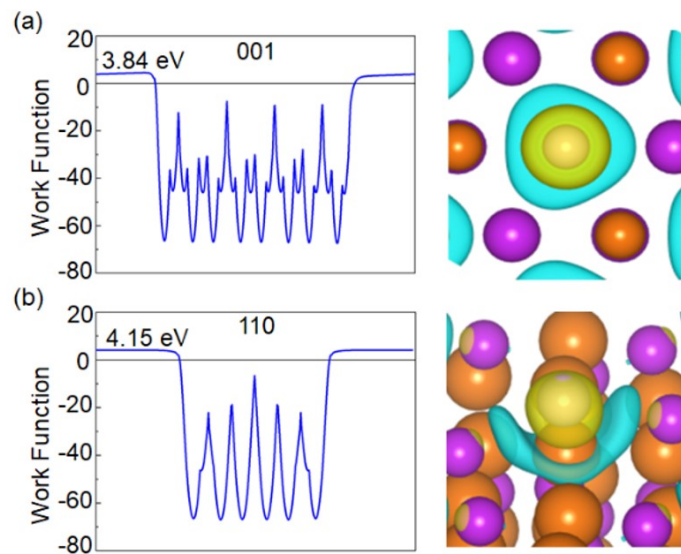

Figure S 3 (a) and (b). The work function and charge differential density of  $\text{Mg}_3\text{Bi}_2$  on (001) and (110) surfaces, respectively.

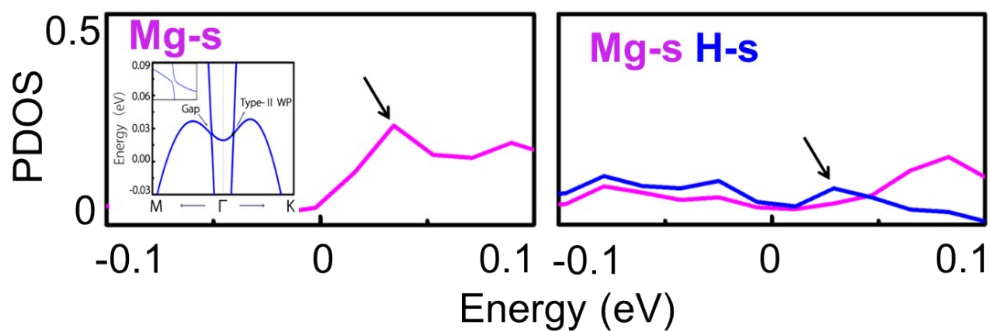

Figure S 4. Projected DOS of the active Mg-s orbital of  $\text{Mg}_3\text{Bi}_2$  catalyst before and after interacting with the H intermediate

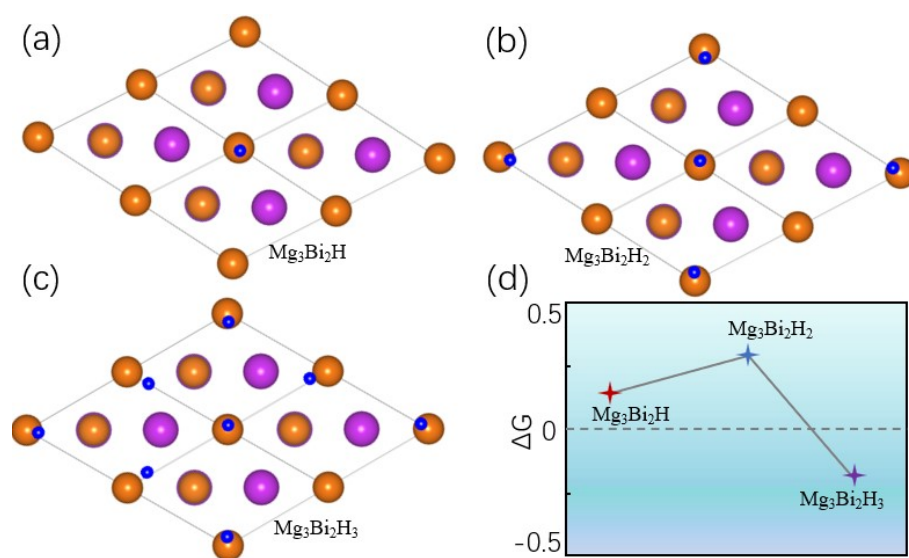

Figure S 5 (a) - (c) The optimized supercell structure of  $\text{Mg}_3\text{Bi}_2\text{H}$ ,  $\text{Mg}_3\text{Bi}_2\text{H}_2$ ,  $\text{Mg}_3\text{Bi}_2\text{H}_3$ , respectively. (d) Gibbs free energy of  $\text{Mg}_3\text{Bi}_2$  under different hydrogen coverages.
